# Supplementary material
Source: Springer Nature journal article supplement (https://www.springermedizin.de/resource/supplementary/12879_2006_491_MOESM4_ESM.pdf/9449052)

1

2

3

4

5

6

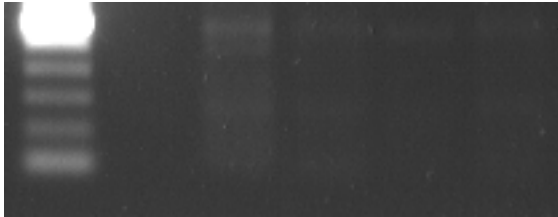

← 570 bp

Supplement: MOESM4 [file 9449052]
